# Supplementary material for: Diagnostic accuracy of point-of-care ultrasound for pulmonary tuberculosis: A systematic review
Source: PubMed Central journal article supplement (PMC8104425; doi:10.1371/journal.pone.0251236), 2021-05-07
Supplement: pone.0251236.s001.pdf [file pone.0251236.s001.pdf]

## S1 Appendix: Search Strategies

**Limits: Jan 1, 2010-  
English or French**

| Platform                       | Database(s)         | Database coverage dates | # Results | Search Date |
|--------------------------------|---------------------|-------------------------|-----------|-------------|
| OvidSP                         | Ovid MEDLINE ALL(R) | 1946 -                  | 1209      | 2020/06/01  |
| OvidSP                         | EMBASE              | 1996 -                  | 709       | 2020/06/01  |
| Web of Science                 | SCI-EXPANDED, ESCI  | 1900 -                  | 665       | 2020/06/01  |
| Cochrane Library               | CENTRAL (Trials)    | Inception -             | 232       | 2021/02/10  |
| Scopus                         |                     | Inception-              | 3133      | 2020/06/01  |
| <b>TOTAL NUMBER OF RECORDS</b> |                     |                         | 5879      |             |

**Number of records after duplicates removed: 3919 records**

MEDLINE (Ovid), June 1, 2020

1209 records

Database: Ovid MEDLINE(R) ALL <1946 to May 29, 2020>

Search Strategy:

- 
- 1 exp tuberculosis/ or mycobacterium tuberculosis/ (211746)
  - 2 tuberculo\*.cl,mp,so. or (tb or ptb).ti,kf. (264635)
  - 3 1 or 2 (265038)
  - 4 exp ultrasonography/ (434551)
  - 5 (echogra\* or echoscop\* or echosound\* or ultraso\* or sonogra\* or sonolog\* or POCUS).cl,mp,so. (513962)
  - 6 4 or 5 (646410)
  - 7 diagnosis/ or predictive value of tests/ or exp "sensitivity and specificity"/ or exp ultrasonography/di, dg (597440)
  - 8 (diagnos\* or detect\* or gold standard or index test\* or inter method\* or intermethod\* or inter rater or inter reader or point of care or reference standard\* or reproducib\* or screen\* or triag\* or sensitiv\* or positive\* or negative\* or specific\* or accura\* or roc or "area under the curve").cl,mp,so. or (assess\* or compar\* or evaluat\* or feasib\* or finding\* or utility or valid\*).cl,ti,so. (12730590)
  - 9 7 or 8 (12755581)
  - 10 3 and 6 and 9 (2748)
  - 11 ((tuberculo\* or tb or ptb or infectious disease\* or communicable disease\*) and (echogra\* or echoscop\* or echoso\* or ultraso\* or sonogra\* or sonolog\* or POCUS)).ti,kf. (544)
  - 12 10 or 11 (2860)
  - 13 limit 12 to yr="2010 -Current" (1302)
  - 14 limit 13 to (english or french) (1209)

\*\*\*\*\*

Embase (Ovid), June 1, 2020

709 records

Database: Embase <1996 to 2020 Week 22>

Search Strategy:

- 
- 1 exp tuberculosis/ or \*mycobacterium tuberculosis/ or tuberculo\*.ti,ab,kw. or (tb or ptb).ti,kw. (188046)
  - 2 exp \*echography/ or (echogra\* or echoscop\* or echosound\* or ultraso\* or sonogra\* or sonolog\* or POCUS).ti,kw. (292289)
  - 3 diagnosis/ or diagnostic accuracy/ or diagnostic test accuracy study/ or point of care system/ or predictive value/ or reliability/ (1138949)
  - 4 (diagnos\* or detect\* or gold standard or index test\* or inter method\* or intermethod\* or inter rater or inter reader or point of care or reference standard\* or reproducib\* or screen\* or triag\* or sensitiv\* or positive\* or negative\* or specific\* or accura\* or roc or "area under the curve").ti,ab,kw. or (assess\* or compar\* or evaluat\* or feasib\* or finding\* or utility or valid\*).ti,kw. (11191098)
  - 5 3 or 4 (11292169)
  - 6 1 and 2 and 5 (1354)
  - 7 ((tuberculo\* or tb or ptb or infectious disease\* or communicable disease\*) and (echogra\* or echoscop\* or echosound\* or ultraso\* or sonogra\* or sonolog\* or POCUS)).ti,kw. (627)
  - 8 6 or 7 (1447)
  - 9 limit 8 to yr="2010 -Current" (1059)
  - 10 limit 9 to (english or french) (994)
  - 11 10 not (conference abstract or conference paper).pt. (709)

\*\*\*\*\*

Science Citation Index – Expanded (SCI-EXPANDED), Emerging Sources Citation Index (ESCI) (Web of Science), June 1, 2020

665 records

(  
(TS=(tuberculo\*) OR TI=(tb OR ptb) OR AK=(tb OR ptb) OR KP=(tb OR ptb))  
AND  
(  
TI=(echogra\* OR echoscop\* OR echosound\* OR ultraso\* OR sonogra\* OR sonolog\* OR POCUS) OR  
AK=(echogra\* OR echoscop\* OR echosound\* OR ultraso\* OR sonogra\* OR sonolog\* OR POCUS) OR  
KP=(echogra\* OR echoscop\* OR echosound\* OR ultraso\* OR sonogra\* OR sonolog\* OR POCUS)  
)  
AND  
(  
TS=(diagnos\* OR detect\* OR "gold standard" OR "index test\*" OR "inter method\*" OR intermethod\*  
OR "inter rater" OR "inter reader" OR "point of care" OR "reference standard\*" OR reproducib\* OR  
screen\* OR triag\* OR sensitiv\* OR positive\* OR negative\* OR specific\* OR accura\* OR roc OR "area  
under the curve") OR TI=(assess\* OR compar\* OR evaluat\* OR feasib\* OR finding\* OR utility OR  
valid\*) OR AK=(assess\* OR compar\* OR evaluat\* OR feasib\* OR finding\* OR utility OR valid\*) OR  
KP=(assess\* OR compar\* OR evaluat\* OR feasib\* OR finding\* OR utility OR valid\*)  
)  
)  
OR  
(  
TI=((tuberculo\* OR tb OR ptb OR "infectious disease\*" OR "communicable disease\*") AND (echogra\*  
OR echoscop\* OR echoso\* OR ultraso\* OR sonogra\* OR sonolog\* OR POCUS)) OR AK= ((tuberculo\*  
OR tb OR ptb OR "infectious disease\*" OR "communicable disease\*") AND (echogra\* OR echoscop\*

OR echoso\* OR ultraso\* OR sonogra\* OR sonolog\* OR POCUS)) OR KP= ((tuberculo\* OR tb OR ptb OR "infectious disease\*" OR "communicable disease\*") AND (echogra\* OR echoscop\* OR echoso\* OR ultraso\* OR sonogra\* OR sonolog\* OR POCUS))

)

Limits:

2010-

English OR French

SCI-EXPANDED, ESCI

\*\*\*\*\*

Scopus, June 1, 2020

3133 records

(

(

(

TITLE-ABS-KEY(tuberculo\*) OR TITLE(tb or ptb) OR KEY(tb or ptb)

)

AND

(

TITLE(echogra\* or echoscop\* or echosound\* or ultraso\* or sonogra\* or sonolog\* or POCUS) OR KEY(echogra\* or echoscop\* or echosound\* or ultraso\* or sonogra\* or sonolog\* or POCUS)

)

AND

(

TITLE-ABS-KEY(diagnos\* or detect\* or "gold standard" or "index test\*" or "inter method\*" or intermethod\* or "inter rater" or "inter reader" or "point of care" or "reference standard\*" or reproducib\* or screen\* or triag\* or sensitiv\* or positive\* or negative\* or specific\* or accura\* or roc or "area under the curve") or TITLE(assess\* or compar\* or evaluat\* or feasib\* or finding\* or utility or valid\*) OR KEY(assess\* or compar\* or evaluat\* or feasib\* or finding\* or utility or valid\*)

)

)

OR

(

TITLE((tuberculo\* or tb or ptb or "infectious disease\*" or "communicable disease\*") and (echogra\* or echoscop\* or echoso\* or ultraso\* or sonogra\* or sonolog\* or POCUS)) OR KEY ((tuberculo\* or tb or ptb or "infectious disease\*" or "communicable disease\*") and (echogra\* or echoscop\* or echoso\* or ultraso\* or sonogra\* or sonolog\* or POCUS))

)

)

AND PUBYEAR AFT 2009 AND LANGUAGE(English or French)

\*\*\*\*\*

Cochrane Central Register of Controlled Trials (Cochrane Library), June 1, 2020

232 records

Search Name:

Date Run: 10/02/2021 16:38:52

Comment:

| ID | Search                                                                                               | Hits |
|----|------------------------------------------------------------------------------------------------------|------|
| #1 | (tuberculo* OR tb OR ptb):ti,ab,kw OR (infectious next disease* OR communicable next disease*):ti,kw |      |
| #2 | (echogra* OR echoscop* OR echosound* OR ultraso* OR sonogra* OR sonolog* OR POCUS):ti,ab,kw          |      |
| #3 | #1 AND #2 with Publication Year from 2010 to 2020, in Trials                                         | 232  |
