# Supplementary material for: Diagnostic accuracy of point-of-care ultrasound for pulmonary tuberculosis: A systematic review
Source: PubMed Central journal article supplement (PMC8104425; doi:10.1371/journal.pone.0251236), 2021-05-07
Supplement: pone.0251236.s002.pdf [file pone.0251236.s002.pdf]

## S2 Appendix: Data Extraction Form

|                                    |                                                                                                                                     |         |              |                 |
|------------------------------------|-------------------------------------------------------------------------------------------------------------------------------------|---------|--------------|-----------------|
| Data extractor                     |                                                                                                                                     |         |              |                 |
| First author                       |                                                                                                                                     |         |              |                 |
| Corresponding author               |                                                                                                                                     |         |              |                 |
| Corresponding author email         |                                                                                                                                     |         |              |                 |
| Title of paper                     |                                                                                                                                     |         |              |                 |
| Language of paper                  |                                                                                                                                     |         |              |                 |
| Publication date                   |                                                                                                                                     |         |              |                 |
| <b>1. STUDY DETAILS</b>            | <b>Highlight answers with a colourful background</b>                                                                                |         |              |                 |
| a. Type of study                   | Quantitative observational study<br>Mixed methods study with a quantitative component<br>Intervention study<br>Unclear/not reported |         |              |                 |
| b. Study data collection           | Prospective<br>Retrospective<br>Unclear/not reported                                                                                |         |              |                 |
| c. Participant selection           | Convenience<br>Consecutive<br>Random<br>Unclear/not reported<br>Other (specify in box to the right)                                 |         |              |                 |
| d. Study country                   |                                                                                                                                     |         |              |                 |
| e. Study region                    |                                                                                                                                     |         |              |                 |
| f. Country income status           | Low<br>Middle<br>High                                                                                                               |         |              |                 |
| <b>2. SETTING AND TEST DETAILS</b> |                                                                                                                                     |         |              |                 |
| a. Healthcare setting              | Primary care<br>Regional hospital<br>Tertiary hospital<br>Other (specify in box to the right)                                       |         |              |                 |
| b. Type of ultrasound used         | Coventional<br>POCUS<br>Unclear/not reported                                                                                        |         |              |                 |
| c. Type of tuberculosis            | PTB<br>Miliary TB<br>EPTB<br>Unclear/not reported<br>Other (specify in box to the right)                                            |         |              |                 |
| d. Purpose of test                 | Screening<br>Diagnosis<br>Unclear/not reported                                                                                      |         |              |                 |
| e. Type of healthcare provider     | Physician<br>Nurse<br>Radiographer/technologist<br>Other (specify in box to the right)<br>Unclear/not reported                      |         |              |                 |
| <b>3. PATIENT DEMOGRAPHICS</b>     | <b>Questions in bold must be answered</b>                                                                                           | Overall | Confirmed TB | Unconfirmed TB  |
|                                    | <b>Data available for category? (yes/no)</b>                                                                                        |         |              | Unlikely/non-TB |
|                                    | Number of included patients                                                                                                         |         |              |                 |
|                                    | Percent female                                                                                                                      |         |              |                 |
|                                    | Median age in years (IQR)                                                                                                           |         |              |                 |
|                                    | Mean age in years (SD)                                                                                                              |         |              |                 |
|                                    | Age range                                                                                                                           |         |              |                 |
|                                    | <b>Children younger than 15 included? (yes/no/unclear)</b>                                                                          |         |              |                 |
|                                    | Percent children younger than 15                                                                                                    |         |              |                 |
|                                    | Median child age in months (IQR)                                                                                                    |         |              |                 |
|                                    | Median child age in years (IQR)                                                                                                     |         |              |                 |
|                                    | Mean child age in months (SD)                                                                                                       |         |              |                 |
|                                    | Mean child age in years (SD)                                                                                                        |         |              |                 |
|                                    | <b>HIV patients included? (yes/no/unclear)</b>                                                                                      |         |              |                 |
|                                    | If yes, what percentage?                                                                                                            |         |              |                 |
|                                    | <b>Past history of TB? (yes/no/unclear)</b>                                                                                         |         |              |                 |
|                                    | If yes, what percentage?                                                                                                            |         |              |                 |
|                                    | <b>Patients on TB treatment included? (yes/no/unclear)</b>                                                                          |         |              |                 |
|                                    | If yes, what percentage?                                                                                                            |         |              |                 |

**4. SPECIMEN TYPES FOR REFERENCE TEST**

If no detailed breakdown, indicate which specimen types were used

Number of specimens Percentage

Sputum  
Brochoalveolar lavage  
Endotracheal aspirate  
Other (specify below)

**5. INDEX TEST**

a. Were the ultrasound results interpreted without knowledge of the results of the reference standard?

Yes  
No  
Unclear/not reported

**6. REFERENCE STANDARD**

**i. Reference standard for adults**

a. Reference standard used

Solid culture LJ  
7H10  
7H11  
Other (specify right)  
Liquid culture MGIT  
Bactec 460  
Other (specify right)  
Molecular test Xpert  
Line probe assay (specify right)  
TB-LAMP (specify right)  
Other (specify right)  
Imaging standard CXR  
CT  
MRI  
Other (specify right)  
Other standard (Specify right)

b. Did all patients receive a reference standard?

Yes  
No  
Unclear/not reported  
If no, why not? (specify right)

c. Did all patients receive the same reference standard?

Yes  
No  
Unclear/not reported  
If no, why not? (specify right)

d. Were the reference standard results interpreted without knowledge of the results of the ultrasound?

Yes  
No  
Unclear/not reported

e. What was the time period between the ultrasound scan and the performance of the reference standard test?

Specify right  
Unclear/not reported

**ii. Reference standard for children**

a. Reference standard used

Solid culture (specify right)  
Liquid culture (specify right)  
Molecular test (specify right)  
Imaging reference standard (specify right)  
Response to treatment reference standard  
i. Specify treatment  
ii. Specify expected response  
iii. Specify time period over which response was monitored  
Composite reference standard (specify right)  
Clinical reference standard (specify right)  
Other reference standard (specify right)

b. Did all patients receive a reference standard?

Yes  
No  
Unclear/not reported  
If no, why not? (specify right)

c. Did all patients receive the same reference standard?

Yes  
No  
Unclear/not reported  
If no, why not? (specify right)

d. Were the reference standard results interpreted without knowledge of the results of the ultrasound?

- Yes
- No
- Unclear/not reported

e. What was the time period between the ultrasound scan and the performance of the reference standard test?

- Specify right
- Unclear/not reported

**7. ANALYSIS**

a. Were all patients included in the analysis?

- Yes
- No
- Unclear/not reported

**8. RESULTS**

**A. Adults**

**i. Higher-quality reference standard (liquid or solid culture or molecular test)**

a. True positives, false positives, true negatives, false negatives:

Not reported

|   | Ultrasound finding (e.g. consolidation) | Reference standard result |          | Total |
|---|-----------------------------------------|---------------------------|----------|-------|
|   |                                         | Ultrasound result         | Positive |       |
| 1 |                                         | Positive                  |          |       |
|   |                                         | Negative                  |          |       |
|   |                                         | <b>Total</b>              |          |       |
| 2 |                                         | Positive                  |          |       |
|   |                                         | Negative                  |          |       |
|   |                                         | <b>Total</b>              |          |       |
| 3 |                                         | Positive                  |          |       |
|   |                                         | Negative                  |          |       |
|   |                                         | <b>Total</b>              |          |       |
| 4 |                                         | Positive                  |          |       |
|   |                                         | Negative                  |          |       |
|   |                                         | <b>Total</b>              |          |       |
| 5 |                                         | Positive                  |          |       |
|   |                                         | Negative                  |          |       |
|   |                                         | <b>Total</b>              |          |       |
| 6 |                                         | Positive                  |          |       |
|   |                                         | Negative                  |          |       |
|   |                                         | <b>Total</b>              |          |       |
| 7 |                                         | Positive                  |          |       |
|   |                                         | Negative                  |          |       |
|   |                                         | <b>Total</b>              |          |       |
| 8 |                                         | Positive                  |          |       |
|   |                                         | Negative                  |          |       |
|   |                                         | <b>Total</b>              |          |       |

(add more rows if required)

Specify reference standard

- Liquid culture
- Solid culture
- Molecular test

b. Area under the curve

- Specify right
- Not reported

**ii. Lower-quality reference standard (correlation with another imaging modality)**

a. True positives, false positives, true negatives, false negatives:

Not reported

|   | Ultrasound finding (e.g. consolidation) | Reference standard result |          | Total |
|---|-----------------------------------------|---------------------------|----------|-------|
|   |                                         | Ultrasound result         | Positive |       |
| 1 |                                         | Positive                  |          |       |
|   |                                         | Negative                  |          |       |
|   |                                         | <b>Total</b>              |          |       |
| 2 |                                         | Positive                  |          |       |
|   |                                         | Negative                  |          |       |
|   |                                         | <b>Total</b>              |          |       |
| 3 |                                         | Positive                  |          |       |
|   |                                         | Negative                  |          |       |
|   |                                         | <b>Total</b>              |          |       |
| 4 |                                         | Positive                  |          |       |
|   |                                         | Negative                  |          |       |
|   |                                         | <b>Total</b>              |          |       |
| 5 |                                         | Positive                  |          |       |
|   |                                         | Negative                  |          |       |
|   |                                         | <b>Total</b>              |          |       |
| 6 |                                         | Positive                  |          |       |
|   |                                         | Negative                  |          |       |

|                                                   |                                           |
|---------------------------------------------------|-------------------------------------------|
| 7                                                 |                                           |
| 8                                                 |                                           |
| (add more rows if required)                       |                                           |
| Specify reference standard                        | CXR<br>CT<br>MRI<br>Other (specify right) |
| b. Area under the curve                           | Specify right<br>Not reported             |
| <b>iii. Kappa score for reliability</b>           |                                           |
| a. Kappa score for <b>inter-rater</b> reliability | Not reported                              |
| Ultrasound finding                                | Kappa score                               |
| (add more rows if required)                       |                                           |
| b. Kappa score for <b>intra-rater</b> reliability | Not reported                              |
| Ultrasound finding                                | Kappa score                               |
| (add more rows if required)                       |                                           |

|              |  |
|--------------|--|
| <b>Total</b> |  |
| Positive     |  |
| Negative     |  |
| <b>Total</b> |  |
| Positive     |  |
| Negative     |  |
| <b>Total</b> |  |

**B. Children**  
**i. Validity** (if multiple reference standards used, complete multiple tables)  
a. True positives, false positives, true negatives, false negatives:

|                                         |                                                                                                                                         |
|-----------------------------------------|-----------------------------------------------------------------------------------------------------------------------------------------|
|                                         | Not reported                                                                                                                            |
| Ultrasound finding (e.g. consolidation) |                                                                                                                                         |
| 1                                       |                                                                                                                                         |
| 2                                       |                                                                                                                                         |
| 3                                       |                                                                                                                                         |
| 4                                       |                                                                                                                                         |
| 5                                       |                                                                                                                                         |
| 6                                       |                                                                                                                                         |
| 7                                       |                                                                                                                                         |
| 8                                       |                                                                                                                                         |
| Specify reference standard              | Liquid culture<br>Solid culture<br>Molecular test<br>Imaging<br>Composite<br>Clinical<br>Response to treatment<br>Other (specify right) |
| b. Area under the curve                 | Specify right<br>Not reported                                                                                                           |

|                   | Reference standard result |          |       |
|-------------------|---------------------------|----------|-------|
| Ultrasound result | Positive                  | Negative | Total |
| Positive          |                           |          |       |
| Negative          |                           |          |       |
| <b>Total</b>      |                           |          |       |
| Positive          |                           |          |       |
| Negative          |                           |          |       |
| <b>Total</b>      |                           |          |       |
| Positive          |                           |          |       |
| Negative          |                           |          |       |
| <b>Total</b>      |                           |          |       |
| Positive          |                           |          |       |
| Negative          |                           |          |       |
| <b>Total</b>      |                           |          |       |
| Positive          |                           |          |       |
| Negative          |                           |          |       |
| <b>Total</b>      |                           |          |       |

**Data for second reference standard (if required)**

a. True positives, false positives, true negatives, false negatives:

Not reported

Ultrasound finding (e.g. consolidation)

1

Positive

Negative

**Total**

2

Positive

Negative

**Total**

3

Positive

Negative

**Total**

4

Positive

Negative

**Total**

5

Positive

Negative

**Total**

6

Positive

Negative

**Total**

7

Positive

Negative

**Total**

8

Positive

Negative

**Total**

Specify reference standard

Liquid culture

Solid culture

Molecular test

Imaging

Composite

Clinical

Response to treatment

Other (specify right)

b. Area under the curve

Specify right

Not reported

**iii. Kappa score for reliability**

a. Kappa score for **inter**-rater reliability

Not reported

Ultrasound finding

Kappa score

(add more rows if required)

b. Kappa score for **intra**-rater reliability

Not reported

Ultrasound finding

Kappa score

(add more rows if required)

**9. QUADAS-2**

**DOMAIN 1: PATIENT SELECTION**

**A. Risk of Bias**

Was a consecutive or random sample of patients enrolled?

Yes

No

Unclear

Was a case-control design avoided?

Yes

No

Unclear

Did the study avoid inappropriate exclusions?

Yes

No

Unclear

Could the selection of patients have introduced bias?

**LOW RISK**

**HIGH RISK**

**UNCLEAR RISK**

**Reference standard result**  
**Ultrasound result**    Positive    Negative    **Total**

| Ultrasound result | Positive | Negative | Total |
|-------------------|----------|----------|-------|
| 1 Positive        |          |          |       |
| 1 Negative        |          |          |       |
| <b>Total</b>      |          |          |       |
| 2 Positive        |          |          |       |
| 2 Negative        |          |          |       |
| <b>Total</b>      |          |          |       |
| 3 Positive        |          |          |       |
| 3 Negative        |          |          |       |
| <b>Total</b>      |          |          |       |
| 4 Positive        |          |          |       |
| 4 Negative        |          |          |       |
| <b>Total</b>      |          |          |       |
| 5 Positive        |          |          |       |
| 5 Negative        |          |          |       |
| <b>Total</b>      |          |          |       |
| 6 Positive        |          |          |       |
| 6 Negative        |          |          |       |
| <b>Total</b>      |          |          |       |
| 7 Positive        |          |          |       |
| 7 Negative        |          |          |       |
| <b>Total</b>      |          |          |       |
| 8 Positive        |          |          |       |
| 8 Negative        |          |          |       |
| <b>Total</b>      |          |          |       |

|                                                                                                                     |                                                         |
|---------------------------------------------------------------------------------------------------------------------|---------------------------------------------------------|
| <b>B. Concerns regarding applicability</b>                                                                          |                                                         |
| Is there concern that the included patients do not match the review question?                                       | <b>LOW CONCERN<br/>HIGH CONCERN<br/>UNCLEAR CONCERN</b> |
| <b>DOMAIN 2: INDEX TEST(S)</b>                                                                                      |                                                         |
| <b>If more than one index test was used, please complete for each test.</b>                                         |                                                         |
| <b>A. Risk of Bias</b>                                                                                              |                                                         |
| Were the index test results interpreted without knowledge of the results of the reference standard?                 | Yes<br>No<br>Unclear                                    |
| If a threshold was used, was it pre-specified                                                                       | Yes<br>No<br>Unclear                                    |
| <b>Could the conduct or interpretation of the index test have introduced bias?</b>                                  | <b>LOW RISK<br/>HIGH RISK<br/>UNCLEAR RISK</b>          |
| <b>B. Concerns regarding applicability</b>                                                                          |                                                         |
| Is there concern that the index test, its conduct, or interpretation differ from the review question?               | <b>LOW CONCERN<br/>HIGH CONCERN<br/>UNCLEAR CONCERN</b> |
| <b>DOMAIN 3: REFERENCE STANDARD</b>                                                                                 |                                                         |
| <b>A. Risk of Bias</b>                                                                                              |                                                         |
| Is the reference standard likely to correctly classify the target condition?                                        | Yes<br>No<br>Unclear                                    |
| Were the reference standard results interpreted without knowledge of the results of the index test?                 | Yes<br>No<br>Unclear                                    |
| <b>Could the reference standard, its conduct, or its interpretation have introduced bias?</b>                       | <b>LOW RISK<br/>HIGH RISK<br/>UNCLEAR RISK</b>          |
| <b>B. Concerns regarding applicability</b>                                                                          |                                                         |
| Is there concern that the target condition as defined by the reference standard does not match the review question? | <b>LOW CONCERN<br/>HIGH CONCERN<br/>UNCLEAR CONCERN</b> |
| <b>DOMAIN 4: FLOW AND TIMING</b>                                                                                    |                                                         |
| <b>A. Risk of Bias</b>                                                                                              |                                                         |
| Was there an appropriate interval between index test(s) and reference standard?                                     | Yes<br>No<br>Unclear                                    |
| Did all patients receive a reference standard?                                                                      | Yes<br>No<br>Unclear                                    |
| Did patients receive the same reference standard?                                                                   | Yes<br>No<br>Unclear                                    |
| Were all patients included in the analysis?                                                                         | Yes<br>No<br>Unclear                                    |
| Could the patient flow have introduced bias?                                                                        | <b>LOW RISK<br/>HIGH RISK<br/>UNCLEAR RISK</b>          |
| <b>complete only if paper had reproducibility data</b>                                                              |                                                         |
| <b>Additional: REPRODUCIBILITY</b>                                                                                  |                                                         |
| Was the time interval between the repeated tests appropriate?                                                       | Yes<br>No<br>Unclear                                    |
| Were the test conditions similar for the repeated tests (type of administration, environment, instructions)?        | Yes<br>No<br>Unclear                                    |
| Was a Kappa score calculated?                                                                                       | Yes<br>No<br>Unclear                                    |

Could the reproducibility data be biased?

**LOW RISK**  
**HIGH RISK**  
**UNCLEAR RISK**
