# Supplementary material for: Diagnostic accuracy of point-of-care ultrasound for pulmonary tuberculosis: A systematic review
Source: PubMed Central journal article supplement (PMC8104425; doi:10.1371/journal.pone.0251236), 2021-05-07
Supplement: pone.0251236.s003.pdf [file pone.0251236.s003.pdf]

### **S3 Appendix: Additional reproducibility domain for quality assessment**

- (1) Was the time interval between the repeated tests appropriate? [Yes/No/Unclear]
- (2) Were the test conditions similar for the repeated tests (type of administration, environment, instructions)? [Yes/No/Unclear]
- (3) Was a Kappa score calculated? [Yes/No/Unclear].

Like the risk of bias questions in QUADAS-2, the answer to the question “Could the reproducibility data be biased?” [Low risk/High risk/Unclear risk] was based on the answers to the three reproducibility criteria questions.

Based on the work of Mookink et al. (2018) (28).
